# Supplementary material for: Differential Contribution of the Repeats to Heparin Binding of HBHA, a Major Adhesin of Mycobacterium tuberculosis
Source: PLOS journal article supplement (doi:10.1371/journal.pone.0032421), 2012-03-05
Supplement: S2 (10.1371/journal.pone.0032421.s002) [file journal.pone.0032421.s002]

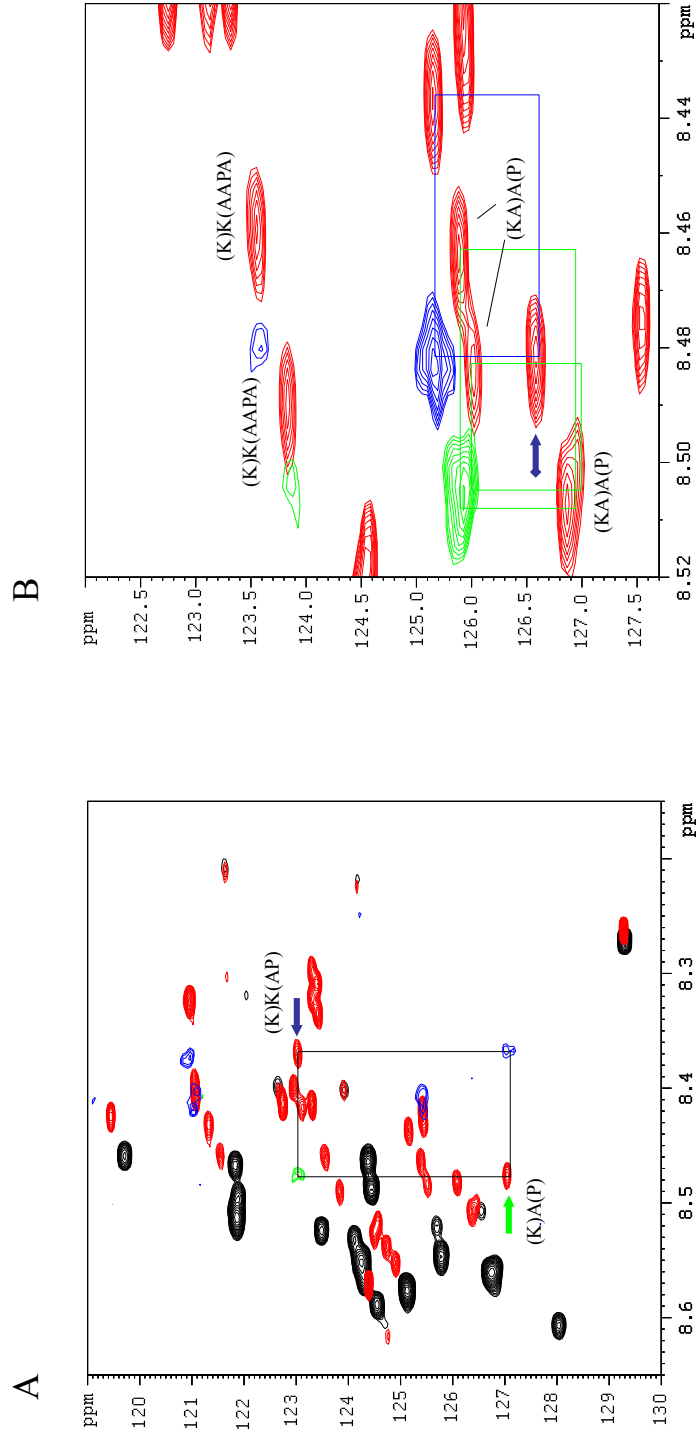

Figure S2
